# Supplementary material for: TERT promoter mutations and gene amplification: Promoting TERT expression in Merkel cell carcinoma
Source: PubMed Central journal article supplement (PMC4259404; doi:10.18632/oncotarget.2491), 2014-09-16
Supplement: oncotarget-05-10048-s001.pdf [file oncotarget-05-10048-s001.pdf]

# TERT promoter mutations and gene amplification: Promoting TERT expression in Merkel cell carcinoma

## Supplementary Material

Supplementary Table S1. Clinical details, follow-up, MCV and TERT promoter statuses of MCC cases in the study.

| Case no. <sup>1</sup> | TERT promoter sequence | Sex | Age at diagnosis (years) | Sample analyzed |            | MCV status <sup>2</sup> | Primary tumor |                |           | Follow-up |               |          |
|-----------------------|------------------------|-----|--------------------------|-----------------|------------|-------------------------|---------------|----------------|-----------|-----------|---------------|----------|
|                       |                        |     |                          | tumor           | material   |                         | Size (cm)     | Anatomic site  | Local Rec | Met       | Time (months) | Outcome  |
| MCCT_1a               | wt                     | F   | 91                       | P               | FFPE       | -                       | 2             | face           | no        | yes       | 79            | Dead     |
| MCCT_1b               | wt                     |     |                          | Met             | FFPE       | -                       |               |                |           |           |               |          |
| MCCT_2a               | C250T                  | F   | 91                       | P               | FFPE       | -                       | 1.5           | face           | yes       | yes       | 20            | Dead-DOD |
| MCCT_2b               | C250T                  |     |                          | L Rec           | FFPE       | -                       |               |                |           |           |               |          |
| MCCT_3a               | wt                     | F   | 83                       | P               | FFPE       | +                       | 1.5           | face           | no        | yes       | 6             | Dead-DOD |
| MCCT_3b               | wt                     |     |                          | Met             | FFPE       | +                       |               |                |           |           |               |          |
| MCCT_4a               | wt                     | M   | 69                       | P               | FFPE & Frz | +                       | 3.5           | elbow          | no        | yes       | 17            | Dead-DOD |
| MCCT_4b               | wt                     |     |                          | Met             | FFPE       | +                       |               |                |           |           |               |          |
| MCCT_5a               | wt                     | F   | 84                       | P               | FFPE       | +                       | 1             | face           | yes       | yes       | 11            | Dead-DOD |
| MCCT_5b               | wt                     |     |                          | L Rec           | FFPE       | +                       |               |                |           |           |               |          |
| MCCT_6a               | wt                     | M   | 74                       | P               | FFPE       | +                       | 4.5           | elbow          | yes       | no        | 113           | Dead     |
| MCCT_6b               | wt                     |     |                          | L Rec           | FFPE       | +                       |               |                |           |           |               |          |
| MCCT_7a               | wt                     | F   | 87                       | P               | FFPE & Frz | +                       | 2.5           | face           | yes       | yes       | 13            | Dead-DOD |
| MCCT_7b               | wt                     |     |                          | Met             | FFPE       | +                       |               |                |           |           |               |          |
| MCCT_8                | wt                     | F   | 85                       | P               | FFPE       | +                       | 3.5           | forearm        | n.a.      | n.a.      | n.a.          | n.a.     |
| MCCT_9                | wt                     | M   | 67                       | P               | FFPE & Frz | +                       | 2.3           | face           | no        | no        | 17            | Dead     |
| MCCT_10               | wt                     | F   | 70                       | P               | FFPE       | +                       | n.a.          | thigh          | no        | no        | 1             | Dead-DOD |
| MCCT_11               | wt                     | F   | 91                       | P               | FFPE       | +                       | 15            | gluteal region | no        | no        | 4             | Dead-DOD |
| MCCT_12               | wt                     | M   | 77                       | P               | FFPE       | -                       | 1             | face           | yes       | yes       | 11            | Dead-DOD |
| MCCT_13               | wt                     | M   | 84                       | P               | FFPE       | -                       | 2.5           | scalp          | no        | yes       | 3             | Dead-DOD |
| MCCT_14               | wt                     | F   | 85                       | P               | FFPE       | +                       | 3             | face           | no        | no        | 155           | Dead     |
| MCCT_15               | wt                     | F   | 77                       | P               | FFPE       | +                       | 1.8           | forearm        | no        | no        | 55            | Dead     |
| MCCT_16a              | wt                     | M   | 62                       | P               | FFPE       | -                       | 3             | groin          | yes       | yes       | 5             | Dead-DOD |
| MCCT_16b              | wt                     |     |                          | Met             | frz        | -                       |               |                |           |           |               |          |
| MCCT_17               | C250T                  | M   | 77                       | P               | FFPE       | -                       | 2             | face           | no        | yes       | 12            | Dead-DOD |
| MCCT_18               | wt                     | M   | 71                       | P               | FFPE       | +                       | 3             | gluteal region | no        | no        | 60            | Dead     |
| MCCT_19               | wt                     | M   | 76                       | L Rec           | FFPE & Frz | +                       | 6             | gluteal region | yes       | no        | 9             | Dead-DOD |
| MCCT_20               | wt                     | F   | 46                       | L Rec           | FFPE & Frz | +                       | 1             | arm            | yes       | yes       | 230           | Alive    |
| MCCT_21               | wt                     | F   | 20                       | L Rec           | FFPE       | -                       | 10            | scalp          | yes       | no        | 277           | Alive    |
| MCCT_22               | wt                     | F   | 63                       | Met             | FFPE       | +                       | 5             | gluteal region | no        | yes       | 222           | Alive    |
| MCCT_23               | wt                     | M   | 81                       | Met             | FFPE       | -                       | 1             | scalp          | no        | yes       | 46            | Dead-DOD |
| MCCT_24               | CC241-242TT            | F   | 72                       | Met             | FFPE       | -                       | 0.7           | face           | no        | yes       | 82            | Dead-DOD |
| MCCT_25               | wt                     | M   | 84                       | Met             | FFPE       | +                       | 0.8           | earlobe        | yes       | yes       | 59            | Dead     |
| MCCT_26               | wt                     | F   | 85                       | Met             | FFPE       | -                       | n.a.          | face           | no        | yes       | 94            | Dead     |
| MCCT_27               | wt                     | F   | 89                       | P               | Frz        | +                       | 4             | face (chin)    | no        | yes       | 4             | Dead-DOD |
| MCCT_28               | wt                     | M   | 94                       | P               | Frz        | +                       | 5             | scalp          | yes       | no        | 17            | Dead-DOD |
| MCCT_29               | C228T                  | M   | 71                       | P               | Frz        | +                       | 2.2           | temple         | no        | yes       | 36            | Alive    |
| MCCT_30               | wt                     | F   | 75                       | P               | Frz        | +                       | 1             | arm            | no        | no        | 35            | Alive    |
| MCCT_31               | wt                     | M   | 83                       | P               | Frz        | +                       | n.a.          | arm (wrist)    | no        | no        | 31            | Alive    |
| MCCT_32               | wt                     | F   | 87                       | P               | Frz        | +                       | 3.1           | temple         | yes       | yes       | 5             | Dead-DOD |
| MCCT_33               | wt                     | M   | 75                       | L Rec           | Frz        | +                       | 0.9           | face (cheek)   | yes       | yes       | 18            | Alive    |
| MCCT_34               | wt                     | F   | 73                       | P               | Frz        | +                       | 3.5           | leg            | no        | yes       | 12            | Alive    |
| MCCT_35               | wt                     | F   | 100                      | P               | Frz        | +                       | n.a.          | face (cheek)   | yes       | yes       | 4             | Alive    |

<sup>1</sup> a and b = primary and recurrent tumor, respectively, of the same patient

<sup>2</sup> MCV status was determined by PCR of tumor genomic DNA combined with IHC for MCV large T-antigen expression

P = Primary tumor; Met = Metastasis; L Rec = Local Recurrence; Frz = Frozen

F = female; M = male; - = negative; + = positive; DOD = died of disease; n.a. = not available

**Supplementary Table S2. Details of telomerase activity, *TERT* mRNA expression, promoter mutation, gene copy number and MCV status in frozen MCC tissues and cell lines.**

| <b>Case no.</b>                      | <b>telomerase activity<sup>1</sup></b> | <b><i>TERT</i> mRNA expression<sup>2</sup></b> | <b><i>TERT</i> copy number</b> | <b><i>TERT</i> promoter</b> | <b>MCV status</b> |
|--------------------------------------|----------------------------------------|------------------------------------------------|--------------------------------|-----------------------------|-------------------|
| <b><i>MCC tumors</i></b>             |                                        |                                                |                                |                             |                   |
| MCCT_27                              | 0.44                                   | 3,346053E-06                                   | 6                              | wt                          | +                 |
| MCCT_19                              | 0.12                                   | 3,26972E-06                                    | 3                              | wt                          | +                 |
| MCCT_16b                             | n.a.                                   | 7,83803E-06                                    | 2                              | wt                          | -                 |
| MCCT_20                              | 0.96                                   | 6,41E-06                                       | 4                              | wt                          | +                 |
| MCCT_4a                              | 0.55                                   | 2,8825E-06                                     | 4                              | wt                          | +                 |
| MCCT_7a                              | 0.94                                   | 3,8134E-06                                     | 3                              | wt                          | +                 |
| MCCT_9                               | 0.85                                   | 4,19244E-06                                    | 4                              | wt                          | +                 |
| MCCT_28                              | n.a.                                   | 1,75341E-06                                    | 1                              | wt                          | +                 |
| MCCT_29                              | 0.75                                   | 7,61933E-06                                    | 3                              | C228T                       | +                 |
| MCCT_30                              | n.a.                                   | 4,86471E-06                                    | 3                              | wt                          | +                 |
| MCCT_31                              | 0.98                                   | 2,35537E-06                                    | 2                              | wt                          | +                 |
| MCCT_32                              | 0.82                                   | 8,65326E-06                                    | 8                              | wt                          | +                 |
| MCCT_33                              | n.a.                                   | 6,79139E-06                                    | 10                             | wt                          | +                 |
| MCCT_34                              | 0.35                                   | 2,08505E-05                                    | 12                             | wt                          | +                 |
| MCCT_35                              | 0.23                                   | 3,35682E-06                                    | n.a.                           | wt                          | +                 |
| <b><i>Established Cell lines</i></b> |                                        |                                                |                                |                             |                   |
| MCC13                                | 0.99                                   | 2,1141E-07                                     | 2                              | wt                          | -                 |
| MCC14/2                              | 2.11                                   | 8,98708E-07                                    | 2                              | wt                          | -                 |
| MCC26                                | 2.17                                   | 6,5694E-06                                     | 5                              | C250T                       | -                 |
| MKL-1                                | 2.25                                   | 4,29874E-06                                    | 2                              | wt                          | +                 |
| MKL-2                                | 0.74                                   | 8,90906E-07                                    | 2                              | wt                          | +                 |
| WaGa                                 | 2.01                                   | 2,67291E-06                                    | 2                              | wt                          | +                 |

<sup>1</sup> Telomerase activity was expressed as folds of that in HEK-293 cells

<sup>2</sup> *TERT* mRNA expression was determined by qPCR, normalized to *18S rRNA* and reported as  $2^{-\Delta C_T}$ .

**Supplementary Table S3. Details of *TERT* mRNA expression, promoter mutation and MCV status in FFPE MCC tumors.**

| <b>Case no.</b> | <b><i>TERT</i> mRNA expression<sup>1</sup></b> | <b><i>TERT</i> promoter</b> | <b>MCV status</b> |
|-----------------|------------------------------------------------|-----------------------------|-------------------|
| MCCT_1a         | 0.0005                                         | wt                          | -                 |
| MCCT_1b         | 0.0043                                         | wt                          | -                 |
| MCCT_2a         | 0.0081                                         | C250T                       | -                 |
| MCCT_2b         | 0.0101                                         | C250T                       | -                 |
| MCCT_3a         | 0.0224                                         | wt                          | +                 |
| MCCT_3b         | 0.0153                                         | wt                          | +                 |
| MCCT_4a         | 0.0081                                         | wt                          | +                 |
| MCCT_4b         | 0.0032                                         | wt                          | +                 |
| MCCT_5a         | 0.0073                                         | wt                          | +                 |
| MCCT_5b         | 0.0108                                         | wt                          | +                 |
| MCCT_6a         | 0.0376                                         | wt                          | +                 |
| MCCT_6b         | 0.0353                                         | wt                          | +                 |
| MCCT_7a         | 0.0129                                         | wt                          | +                 |
| MCCT_7b         | N.D.                                           | wt                          | +                 |
| MCCT_8          | 0.0151                                         | wt                          | +                 |
| MCCT_9          | 0.0070                                         | wt                          | +                 |
| MCCT_10         | N.D.                                           | wt                          | +                 |
| MCCT_11         | 0.0035                                         | wt                          | +                 |
| MCCT_12         | 0.0318                                         | wt                          | -                 |
| MCCT_13         | 0.0203                                         | wt                          | -                 |
| MCCT_14         | 0.0091                                         | wt                          | +                 |
| MCCT_15         | 0.0115                                         | wt                          | +                 |
| MCCT_16a        | 0.0773                                         | wt                          | -                 |
| MCCT_17         | 0.0092                                         | C250T                       | -                 |
| MCCT_18         | 0.0441                                         | wt                          | +                 |
| MCCT_19         | 0.0163                                         | wt                          | +                 |
| MCCT_20         | 0.0010                                         | wt                          | +                 |
| MCCT_21         | 0.0018                                         | wt                          | -                 |
| MCCT_22         | 0.0006                                         | wt                          | +                 |
| MCCT_23         | 0.0126                                         | wt                          | -                 |
| MCCT_24         | 0.0070                                         | CC241-242TT                 | -                 |
| MCCT_25         | 0.02303                                        | wt                          | +                 |
| MCCT_26         | 0.0014                                         | wt                          | -                 |

<sup>1</sup> *TERT* mRNA expression was determined by RT-qPCR, normalized to *ACTB* and reported as  $2^{-\Delta Ct}$ .

N.D. = not detectable

**Supplementary Table S4. Association of TERT expression levels (in FFPE samples), TERT promoter mutation and TERT copy number with clinical features in MCC patients.**

| Clinical parameter                  | TERT mRNA expression (only FFPE) |      |              | TERT promoter mutation |    |              | TERT gene amplification |    |          |
|-------------------------------------|----------------------------------|------|--------------|------------------------|----|--------------|-------------------------|----|----------|
|                                     | Low                              | High | P-value*     | Yes                    | No | P-value*     | Yes                     | No | P-value* |
| Number of MCC patients              | 13                               | 12   |              | 4                      | 31 |              | 11                      | 3  |          |
| Number of MCC samples               | 16                               | 15   |              | 5                      | 38 |              | 11                      | 3  |          |
| <i>Gender</i>                       |                                  |      | <b>0.047</b> |                        |    | 1.000        |                         |    | 0.209    |
| Male                                | 3                                | 8    |              | 2                      | 13 |              | 5                       | 3  |          |
| Female                              | 10                               | 4    |              | 2                      | 18 |              | 6                       | 0  |          |
| <i>Age at diagnosis</i>             |                                  |      | 1.000        |                        |    | 0.603        |                         |    | 0.506    |
| Median (range) years: 77 (20 - 100) |                                  |      |              |                        |    |              |                         |    |          |
| ≤ 77 years                          | 7                                | 6    |              | 3                      | 15 |              | 8                       | 1  |          |
| > 77 years                          | 6                                | 6    |              | 1                      | 16 |              | 3                       | 2  |          |
| <i>Primary tumor size</i>           |                                  |      | 1.000        |                        |    | 0.107        |                         |    | 0.462    |
| Median (range) cm: 2.5 (0.7 - 15)   |                                  |      |              |                        |    |              |                         |    |          |
| ≤ 2.5 cm                            | 7                                | 7    |              | 4                      | 13 |              | 6                       | 0  |          |
| > 2.5 cm                            | 5                                | 5    |              | 0                      | 14 |              | 5                       | 2  |          |
| <i>Recurrence/ metastasis</i>       |                                  |      | 1.000        |                        |    | 0.551        |                         |    | 1.000    |
| Yes                                 | 10                               | 9    |              | 4                      | 22 |              | 9                       | 2  |          |
| No                                  | 3                                | 2    |              | 0                      | 8  |              | 2                       | 1  |          |
| <i>MCV status</i>                   |                                  |      | 0.273        |                        |    | <b>0.024</b> |                         |    | 0.214    |
| Positive                            | 8                                | 11   |              | 1                      | 29 |              | 11                      | 2  |          |
| Negative                            | 8                                | 4    |              | 4                      | 9  |              | 0                       | 1  |          |

\* P-values were determined by Fisher's exact test.
